# Supplementary material for: A rapid and direct method for dating blue pen ink in documents using multiset modeling of infrared spectroscopy and mass spectrometry data
Source: Royal Society of Chemistry journal article supplement (doi:10.1039/d3ay01732j), 2023-01-01
Supplement: d3ay01732j1.pdf [file d3ay01732j1.pdf]

## **SUPPLEMENTARY MATERIAL**

### **A RAPID AND DIRECT METHOD FOR DATING BLUE PEN INK IN DOCUMENTS USING MULTISSET MODELING OF INFRARED SPECTROSCOPY AND MASS SPECTROMETRY DATA**

Kauanny B. N. Braga<sup>a</sup>, Lanaia Í. L. Maciel<sup>b</sup>, Boniek G. Vaz<sup>b</sup>, Licarion Pinto<sup>c</sup>, Jandyson M. Santos<sup>a\*</sup>

*<sup>a</sup>Grupo de Pesquisa em Petróleo, Energia e Espectrometria de Massas (PEM), Departamento de Química, Universidade Federal Rural de Pernambuco - UFRPE, Rua Dom Manoel de Medeiros, s/n, Recife, Pernambuco, 52171-131, Brazil*

*<sup>b</sup>Instituto de Química, Universidade Federal de Goiás, Goiânia, GO, 74690-900, Brazil*

*<sup>c</sup>Departamento de Química Analítica, Instituto de Química, Universidade do Estado do Rio de Janeiro, R. São Francisco Xavier, 524, Maracanã, Rio de Janeiro, RJ, 20550-013, Brazil*

Corresponding author: jandyson.machado@ufrpe.br (Santos, J.M); ORCID: 0000-0002-2099-6728

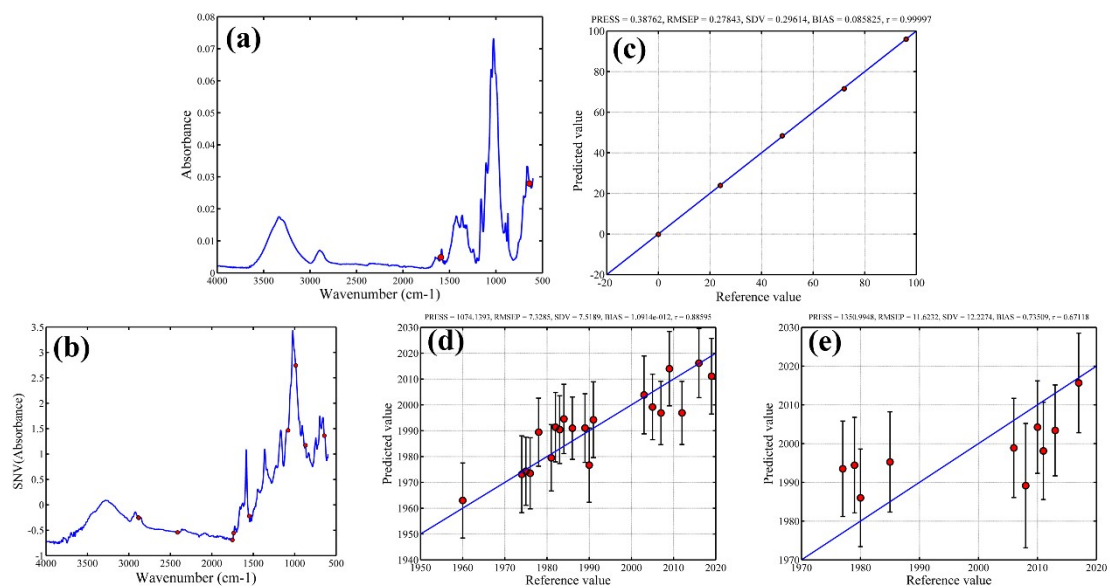

**Figure S1.** Optimum wavenumbers selected using the GA and employed to construct the MLR models for (a) the artificially aged and (b) the real aged documents. Plots of predicted versus reference degradation time values for the MLR models constructed for (c) the artificially aged documents, (d) the real aged documents training set, and (e) the real aged documents test set. The figures of merit and the error bars for the models are shown in the predicted versus reference value graphs.

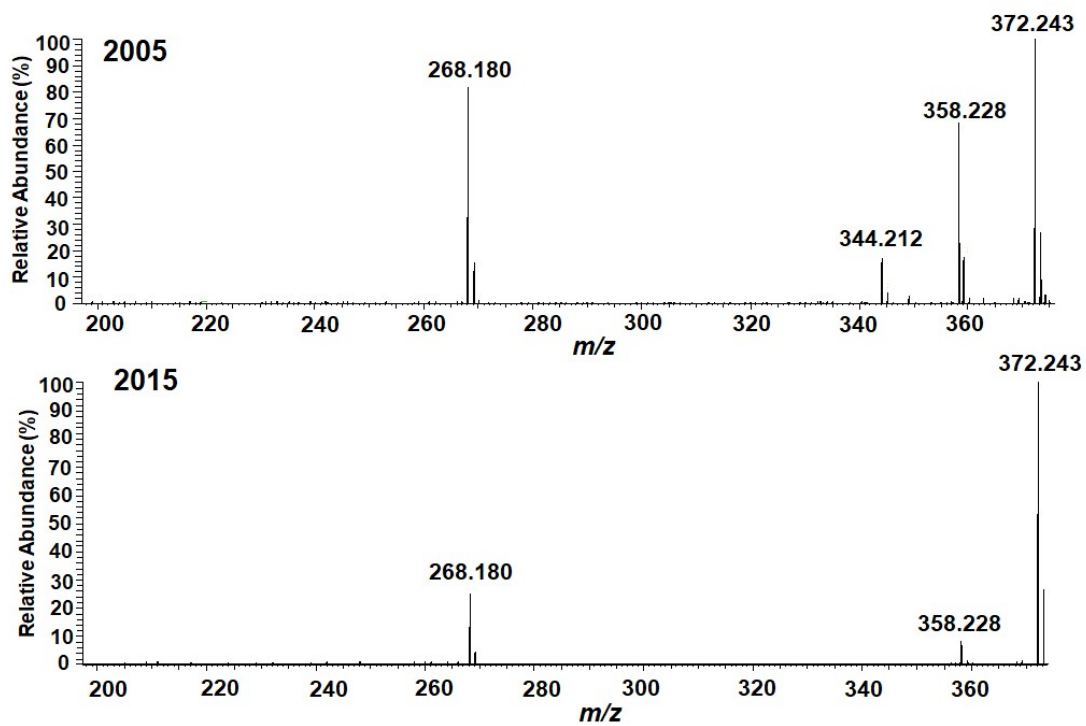

**Figure S2.** DESI-MS spectra of blue pen inks from the 2005 and 2015 document samples.

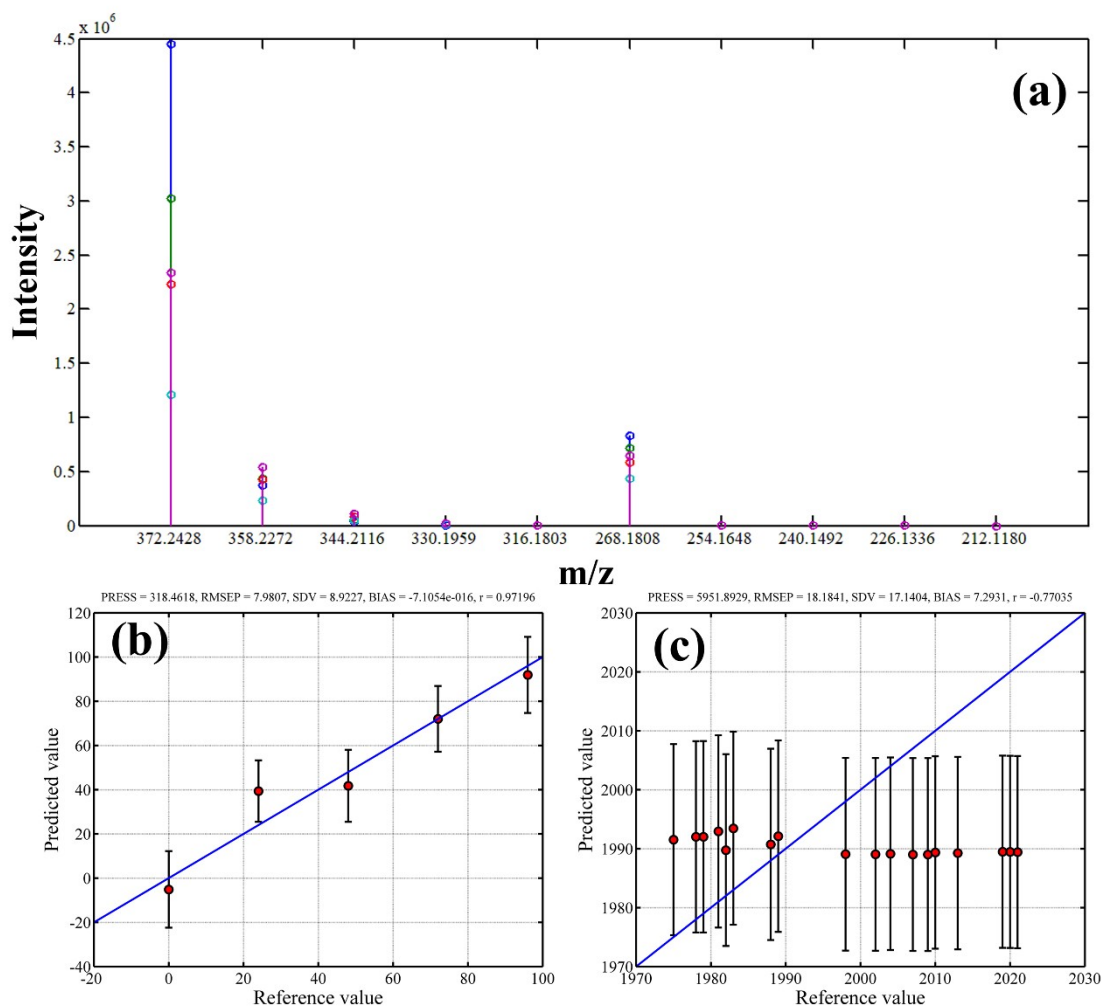

**Figure S3.** (a) DESI-MS values for the artificially aged samples. The BV3 and DG characteristic ions are respectively represented by the  $m/z$  372.2428 and 268.1808 signals and its degradation the following signals with -14 Da differences corresponding to the  $\text{CH}_2$  loss. Predicted versus reference degradation time values for the MLR models constructed for (b) the artificially aged documents and (c) the test set of the real aged documents, using the DESI-MS data. The figures of merit and error bars for the models are shown in the predicted versus reference value graphs.
